# Supplementary material
Source: PubMed Central journal article supplement (PMC5563821)
Supplement: NIHMS860429-supplement-Supplemental_figure_legends.pdf [file NIHMS860429-supplement-Supplemental_figure_legends.pdf]

1  
2  
3  
4 **Supplemental Figure S1. Flow cytometry analyses of WT and p65<sup>Δmye</sup> peritoneal**  
5 **MΦs.** A, Flow cytometry analyses of F4/80, CD11b, and Ly6C expression in WT and p65<sup>Δmye</sup>  
6 peritoneal MΦs. Data represent the mean ± SEM of 2 independent experiments with n = 2-3  
7 mice per group.  
8  
9

10  
11 **Supplementary Figure S2. TLR4 expression is not altered in p65<sup>Δmye</sup> MΦs at**  
12 **steady state or post thioglycollate activation.** A, Levels of F4/80<sup>+</sup> CD11b<sup>+</sup> TLR4<sup>+</sup> MΦs  
13 in peritoneal washes at steady state and following thioglycollate in WT and p65<sup>Δmye</sup> mice. B,  
14 Histograms and quantitative bar graphs of TLR4 expression represented by mean fluorescence  
15 intensity (thioglycollate activated subtracts steady state) in steady state and thioglycollate  
16 activated WT and p65<sup>Δmye</sup> peritoneal cells. Data represent the mean ± SEM of 2 independent  
17 experiments with n = 2-4 mice per group. Significant differences (\*\**p* < 0.01) between groups.  
18  
19  
20  
21  
22  
23  
24  
25  
26  
27  
28  
29  
30  
31  
32  
33  
34  
35  
36  
37  
38  
39  
40  
41  
42  
43  
44  
45  
46  
47  
48  
49  
50  
51  
52  
53  
54  
55  
56  
57  
58  
59  
60
