# Supplementary material
Source: PubMed Central journal article supplement (PMC5563821)
Supplement: NIHMS860429-supplement-Table_S1.pdf [file NIHMS860429-supplement-Table_S1.pdf]

| Gene targeted        | Primer sequence                                                                                                  | Product length |
|----------------------|------------------------------------------------------------------------------------------------------------------|----------------|
| <i>mIL1b</i>         | 5'-TTGACGGACCCCAAAGAT-3' (fwd)<br>5'-GAAGCTGGATGCTCTCATCTG-3' (rev)                                              | 76 bp          |
| <i>mCaspase-1</i>    | 5'-CTTCAATCAGCTCCATCAGC-3' (fwd)<br>5'-AGGGCAAACCTTGAGGGTC-3' (rev)                                              | 144 bp         |
| <i>mHprt</i>         | 5'-GTAATGATCAGTCAACGGGGGAC-3' (fwd)<br>5'-CCAGCAAGCTTGCAACCTTAACCA-3' (rev)                                      | 153 bp         |
| <i>mIfnb</i>         | 5'-ATAAGCAGCTCCAGCTCCAA-3' (fwd)<br>5'-CTGTCTGCTGGTGGAGTTCA-3' (rev)                                             | 267 bp         |
| <i>mCcl12</i>        | 5'-CCATCAGTCCTCAGGTATTGG-3' (fwd)<br>5'-CTTCCGGACGTGAATCTTCT-3' (rev)                                            | 95 bp          |
| <i>mCxcl10</i>       | 5'-GCTGCCGTCATTTTCTGC-3' (fwd)<br>5'-TCTCACTGGCCCGTCATC-3' (rev)                                                 | 111 bp         |
| <i>mIi1b</i> (ChIP)  | 5'-CCTAAGAATTCATCAAGCTT-3' (fwd)<br>5'-CCCCCTCCCCACCCTTCAGTTTTGT-3' (probe)<br>5'-CAGAAGTGAAGAGCTGTGAAA-3' (rev) | 99 bp          |
| <i>mIi6</i> (ChIP)   | 5'-CCCCTTCCTAGTTGTGATTC-3' (fwd)<br>5'-CAATCAGCCCCACCCACTCTGGCCC-3' (probe)<br>5'-AAATCTTTGTTGGAGGGTGG-3' (rev)  | 116 bp         |
| <i>mGapdh</i> (ChIP) | 5'-CTTACAGAGGTCCGCTTGAC-3' (fwd)<br>5'-GTGCAGAGCCGTGGGATGGGGAGCTG-3' (probe)<br>5'-GATGGAAGGGGCTGCTACTA-3' (rev) | 143 bp         |

**Supplemental Table S1.** Sequences of primers and probes used for quantitative real-time PCR. Fwd, forward; rev, reverse; m, mouse.
