# Supplementary material
Source: PubMed Central journal article supplement (PMC5563821)

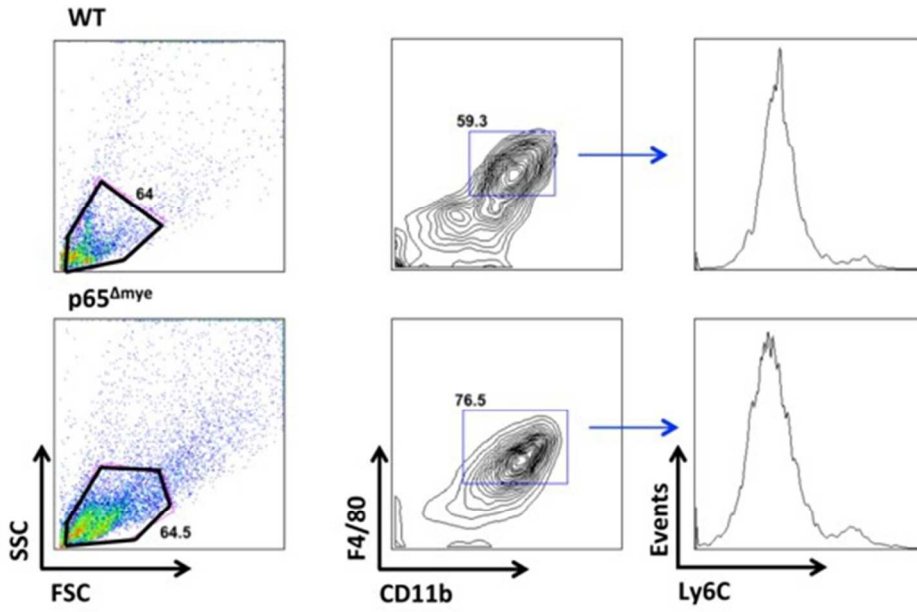

Supplemental Figure S1. Vanoni et al.,

164x132mm (96 x 96 DPI)

view

Supplement: NIHMS860429-supplement-Figure_S1.pdf [file NIHMS860429-supplement-Figure_S1.pdf]

1  
2  
3  
4  
5  
6  
7  
8 (A). TLR4 MFI MΦs  
9

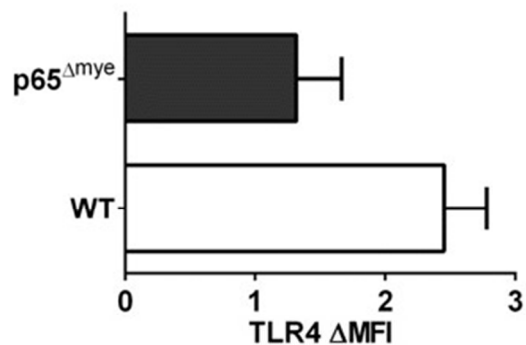

Supplemental Figure S2. Vanoni et al.,

168x106mm (96 x 96 DPI)

Review

Supplement: NIHMS860429-supplement-Figure_S2.pdf [file NIHMS860429-supplement-Figure_S2.pdf]
